# Supplementary material
Source: publisher figshare collection journal article supplement (https://acs.figshare.com/ndownloader/files/4199314)
Supplement: Supplementary file 1 [file 4199314]

## **Supplementary Information:**

### **Origin of dark-channel X-ray fluorescence from transition-metal ions in water**

Robert Seidel,<sup>1</sup> Samira Ghadimi,<sup>1</sup> Kathrin M. Lange,<sup>1</sup> Sébastien Bonhommeau,<sup>2</sup> Mikhail A. Soldatov,<sup>3</sup> Ronny Golnak,<sup>1</sup> Alexander Kothe,<sup>1</sup> René Könnecke,<sup>1</sup> Alexander Soldatov,<sup>1</sup> Stephan Thürmer,<sup>1</sup> Bernd Winter,<sup>1\*</sup> and Emad F. Aziz<sup>1,4\*</sup>

<sup>1</sup>*Helmholtz-Zentrum Berlin für Materialien und Energie,  
Albert-Einstein-Strasse 15, D-12489 Berlin, Germany*

<sup>2</sup>*Institut des Sciences  
Moléculaires, UMR 5255 CNRS, Université Bordeaux 1, 351 cours de la Libération, 33405  
Talence Cedex, France.*

<sup>3</sup>*Research Center for Nanoscale Structure of Matter, Southern Federal University, Sorge 5,  
Rostov-na-Donu 344090, Russia*

<sup>4</sup>*Freie Universität Berlin, FB Physik, Arnimallee 14,  
D-14195 Berlin, Germany*

*\*BW email: bernd.winter@helmholtz-berlin.de, \*EFA email: emad.aziz@helmholtz-berlin.de*

### **Theoretical Modelling:**

To quantify the charge transfer and its direction from X-ray absorption spectra we use ligand field multiplet (LFM) theory<sup>1,2</sup> and optimized our simulated spectra to the transmission spectra at the L-edge of Co<sup>2+</sup> in H<sub>2</sub>O. This approach takes into account all the electronic Coulomb interactions as well as spin-orbit coupling for every shell and local geometrical environment of the absorbing atom applied through the crystal field potential.<sup>3</sup> The spectrum is calculated from the sum of all possible transitions for an electron excited from the 2p level into a 3d level. Dipole allowed 2p→4s transition is neglected due to its low probability. To take into account ligand-to-metal and metal-to-ligand charge transfer (LMCT and MLCT) introduced by covalence, the ground state of a 3d<sup>7</sup> Co ion is taken to be a linear combination of three configurations, 3d<sup>6</sup>L<sup>-</sup>, 3d<sup>7</sup>, and 3d<sup>8</sup>L<sup>-</sup>.<sup>4,5</sup> Co coordination number considered to be six from shape of transmission spectra.<sup>3</sup> Therefore octahedral surrounding of the Co ion is represented by an O<sub>h</sub> crystal field parameter, which strength is given by the crystal field parameter 10Dq. In order to consider lifetime and instrumental broadening calculated transitions were Lorentzian broadened with an fwhm of 0.2 eV over the L<sub>3</sub> edge and 0.35 eV over the L<sub>2</sub> edge and with a Gaussian fwhm of 0.2 eV respectively. Further optimized parameters are given in table S.1. Insignificant values of charge transfer used in multiplet simulations which give the best agreement to experimental data suggest weak covalence of Co-O(H<sub>2</sub>O) bonds. The Slater-Condon-Shortly parameters were reduced to 80% of their Hartree-Fock calculated values. This reduction factor value does not include additional nephelauxetic effect which is also support weak covalence of Co-O(H<sub>2</sub>O) bond.

**Table S.1**

Ground state configuration considered to reproduce the experimental X-ray absorption associated to  $\text{CoCl}_2$  dissolved in water and  $\text{D}_2\text{O}$ . Here  $L^-$  denotes MLCT.

| <b><math>\text{CoCl}_2</math> in <math>\text{H}_2\text{O}</math></b> |                            |
|----------------------------------------------------------------------|----------------------------|
| Ground state configuration                                           | 1.3 % $d^6 L^-$            |
|                                                                      | 82.9 % $d^7$               |
|                                                                      | 15.8 % $d^8 \underline{L}$ |
| Reduction factor $\kappa$ (%)                                        | 80                         |
| $E_a$ (eV)                                                           | 782.1                      |
| $\xi_{2p}$ (eV)                                                      | 9.75                       |
| $\xi_{3d}$ (eV)                                                      | 0.02                       |
| $10Dq$ (eV)                                                          | 1.1                        |
| $\Delta LM$ (eV)                                                     | 3.5                        |
| $\Delta ML$ (eV)                                                     | 10.0                       |
| $U-Q$ (eV)                                                           | -1.0                       |
| $d^6 L^- T(e_g)$                                                     | 0.0                        |
| $d^6 L^- T(t_{2g})$                                                  | 1.0                        |
| $d^8 \underline{L} T(e_g)$                                           | 3.8                        |
| $d^8 \underline{L} T(t_{2g})$                                        | 3.8                        |

### References

- (1) Cowan, R. D. *The theory of atomic structure and spectra*; University of California Press: Berkeley, 1981.
- (2) Butler, P. *Point group symmetry - methods and tables*; Plenum Press: New York, 1981.
- (3) Vanderlaan, G.; Kirkman, I. W. *J Phys-Condens Mat* **1992**, *4*, 4189.
- (4) Vanderlaan, G.; Zaanen, J.; Sawatzky, G. A.; Karnatak, R.; Esteve, J. M. *Phys Rev B* **1986**, *33*, 4253.
- (5) Vanderlaan, G.; Zaanen, J.; Sawatzky, G. A.; Karnatak, R.; Esteve, J. M. *Solid State Commun* **1985**, *56*, 673.
